# Supplementary material
Source: publisher site journal article supplement (https://www.dovepress.com/article/247174)
Supplement: Supplementary file 1 [file get_supplementary_file.php]

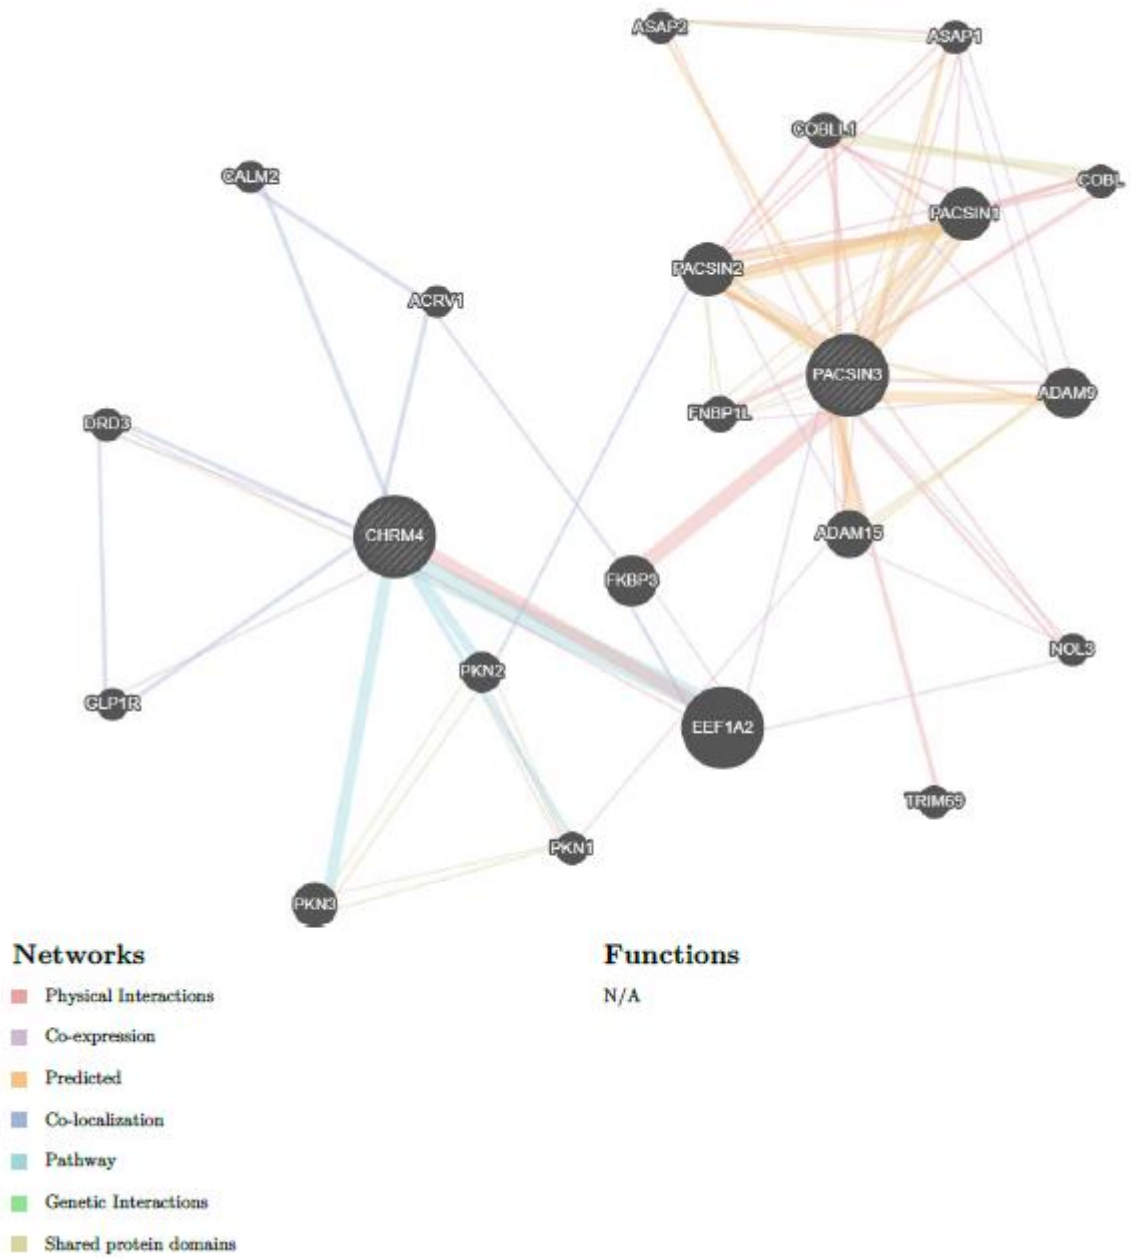

**Figure S1.** The gene network constructed through the online resource for research GeneMANIA

**Table S1.** Frequency of CHRM4 genotypes and alleles in schizophrenia patients with orofacial tardive dyskinesia and without tardive dyskinesia

| SNP        | Genotypes/<br>alleles | Patients with<br>orofacial TD | Patients<br>without TD | OR    |             | $\chi^2$ | p     |
|------------|-----------------------|-------------------------------|------------------------|-------|-------------|----------|-------|
|            |                       |                               |                        | value | 95% CI      |          |       |
| rs2067482  | CC                    | 72 (66.1%)                    | 240 (68.6%)            | 1.10  | 0.64 – 1.61 | 0.996    | 0.608 |
|            | CT                    | 35 (32.1%)                    | 99 (28.3%)             | 1.05  | 0.66 – 1.69 |          |       |
|            | TT                    | 2 (1.8%)                      | 11 (3.1%)              | 0.58  | 0.13 – 2.64 |          |       |
|            | C                     | 0.835                         | 0.827                  | 1.06  | 0.70 – 1.59 | 0.069    | 0.791 |
|            | T                     | 0.165                         | 0.173                  | 0.95  | 0.63 – 1.42 |          |       |
| rs72910092 | CC                    | 103 (93.6%)                   | 324 (92.6%)            | 1.18  | 0.50 – 2.80 | 0.143    | 0.706 |
|            | CT                    | 7 (6.4%)                      | 26 (7.4%)              | 0.85  | 0.36 – 2.01 |          |       |
|            | TT                    | 0 (0.0%)                      | 0 (0.0%)               | -     | -           |          |       |
|            | C                     | 0.968                         | 0.963                  | 1.17  | 0.50 – 2.74 | 0.137    | 0.711 |
|            | T                     | 0.032                         | 0.037                  | 0.85  | 0.37 – 1.99 |          |       |

**Table S2.** Frequency of CHRM4 genotypes and alleles in schizophrenia patients with limb-truncal tardive dyskinesia and without tardive dyskinesia

| SNP        | Genotypes/<br>alleles | Patients with<br>limb-truncal<br>TD | Patients<br>without TD | OR    |             | $\chi^2$ | p     |
|------------|-----------------------|-------------------------------------|------------------------|-------|-------------|----------|-------|
|            |                       |                                     |                        | value | 95% CI      |          |       |
| rs2067482  | CC                    | 40 (60.6%)                          | 272 (69.2%)            | 0.68  | 0.40 – 1.17 | 3.079    | 0.214 |
|            | CT                    | 25 (37.9%)                          | 109 (27.7%)            | 1.59  | 0.92 – 2.74 |          |       |
|            | TT                    | 1 (1.5%)                            | 12 (3.1%)              | 0.49  | 0.06 – 3.82 |          |       |
|            | C                     | 0.796                               | 0.831                  | 0.79  | 0.50 – 1.26 | 0.981    | 0.322 |
|            | T                     | 0.204                               | 0.169                  | 1.26  | 0.80 – 2.00 |          |       |
| rs72910092 | CC                    | 61 (93.8%)                          | 366 (92.7%)            | 1.21  | 0.41 – 3.56 | 0.118    | 0.731 |
|            | CT                    | 4 (6.2%)                            | 29 (7.3%)              | 0.83  | 0.28 – 2.44 |          |       |
|            | TT                    | 0 (0.0%)                            | 0 (0.0%)               | -     | -           |          |       |
|            | C                     | 0.969                               | 0.963                  | 1.20  | 0.42 – 3.47 | 0.114    | 0.736 |
|            | T                     | 0.031                               | 0.037                  | 0.83  | 0.29 – 2.41 |          |       |
